# Supplementary material for: Cultured Human Foreskin as a Model System for Evaluating Ionizing Radiation-Induced Skin Injury
Source: MDPI journal article supplement (doi:10.3390/ijms23179830), 2022-08-29
Supplement: s1 [file s1]

**A**

Effect of culturing on H2A.J expression level

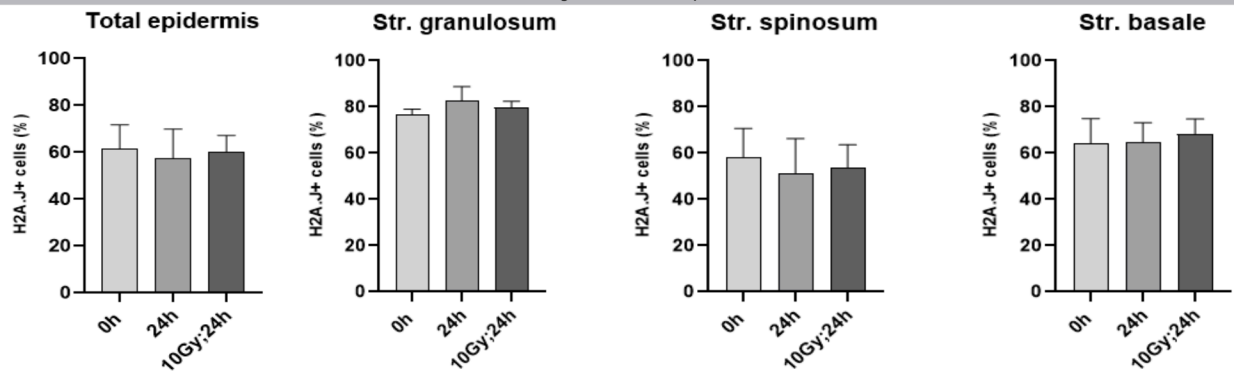**B**

Effect of culturing on Ki67 expression level

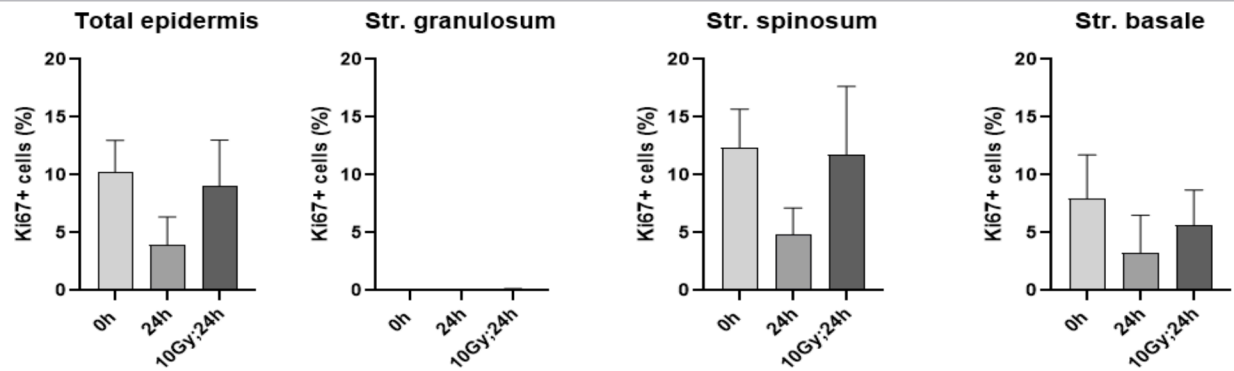

**Supplementary Figure S2: Effects of foreskin explant culturing on H2A.J and Ki67 expression:** Graphic presentation of the quantification of H2A.J+ (A) and Ki67+ keratinocytes (B) in epidermis of foreskin explants prior to (0h) and 0.5 and 24 hours (0.5h; 24h) after culturing, as well as 24h after IR exposure (10Gy; 24h post-IR). Data are presented as mean  $\pm$ SE (n= 12).
