# Supplementary material for: Cultured Human Foreskin as a Model System for Evaluating Ionizing Radiation-Induced Skin Injury
Source: MDPI journal article supplement (doi:10.3390/ijms23179830), 2022-08-29
Supplement: s1 [file s1]

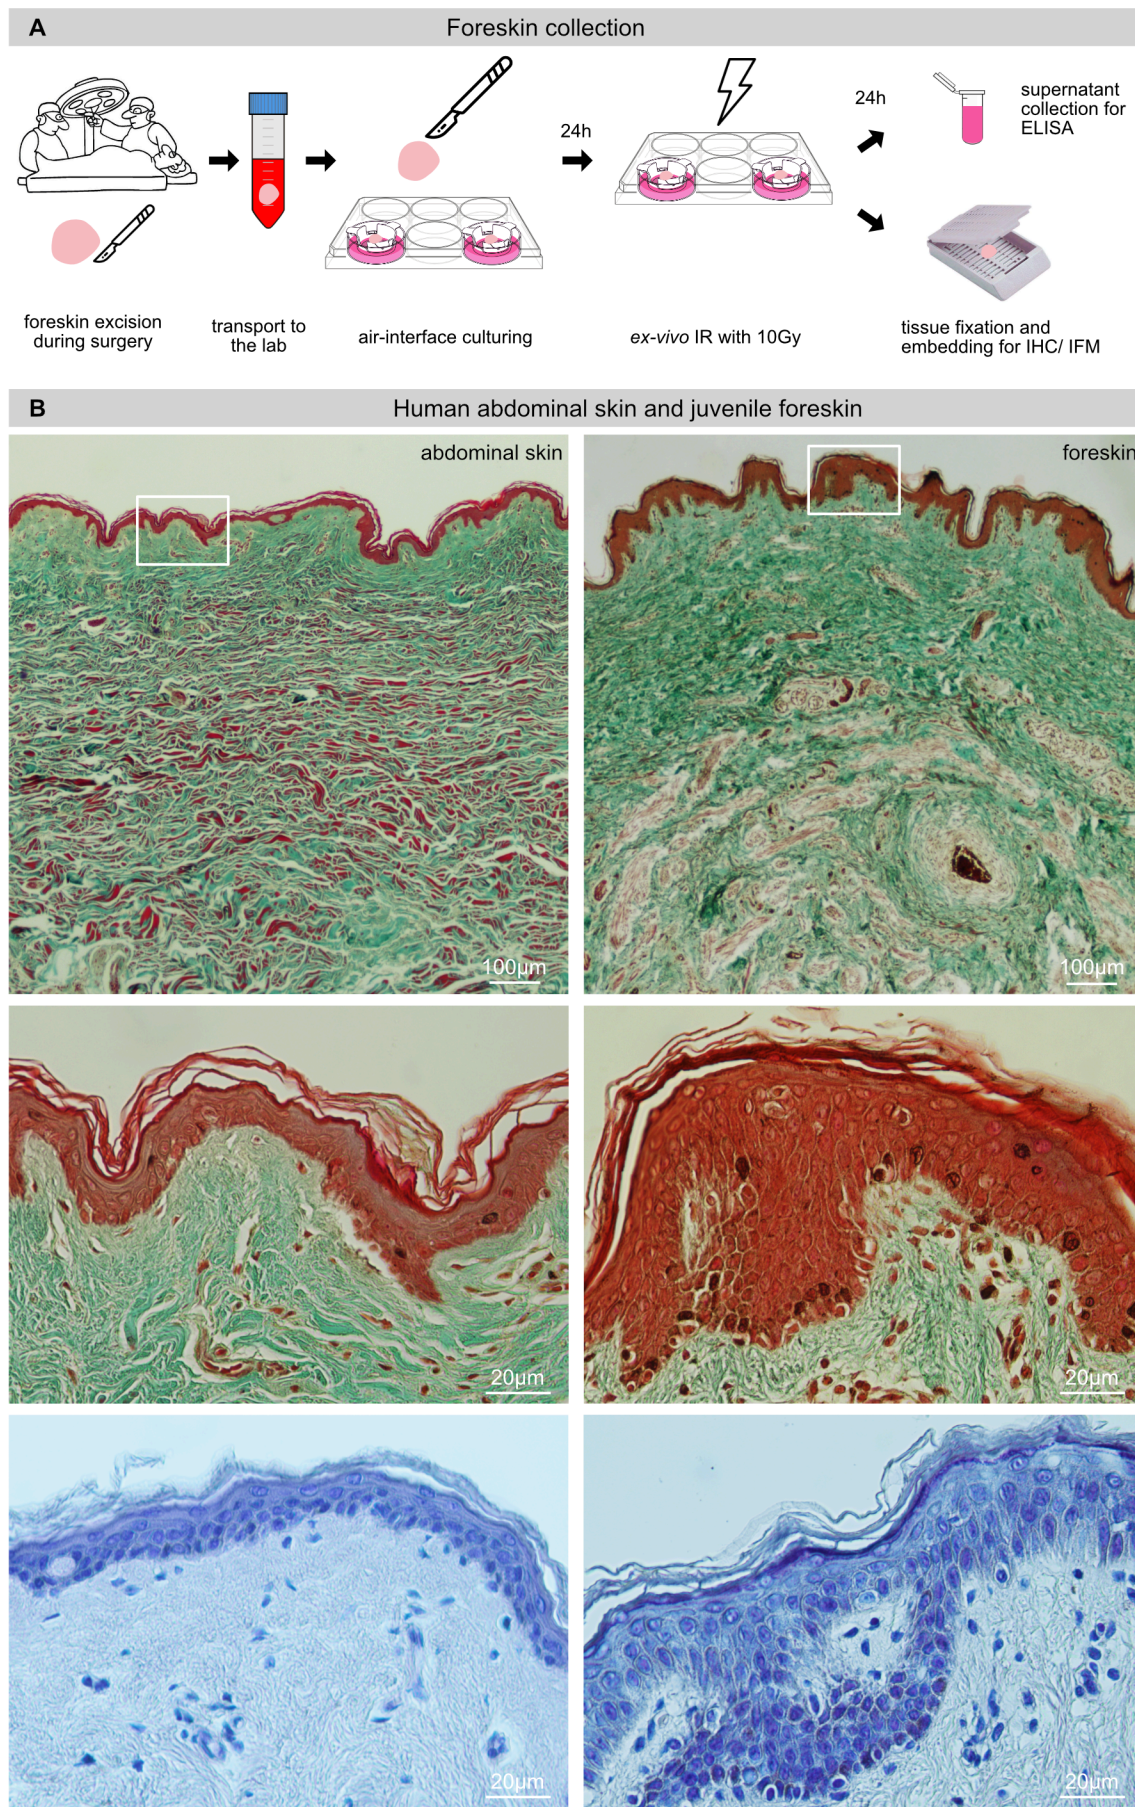

**Supplementary Figure S1: Foreskin sample collection:**

(A) Workflow for foreskin explant culturing and *ex-vivo* IR exposure;

(B) Histological examination of human skin explants by Masson-Goldner and H&E staining
